# Supplementary material
Source: PubMed Central journal article supplement (PMC3057016)
Supplement: NIHMS274133-supplement-Copyright_Statement.pdf [file NIHMS274133-supplement-Copyright_Statement.pdf]

**Hedley Whyte, E. Tessa**

**From:** Springer [springerauthorquery@springeronline.com]  
**Sent:** Saturday, September 04, 2010 10:15 AM  
**To:** Hedley Whyte, E. Tessa  
**Subject:** Copyright Transfer Statement (CTS) for your article in Acta Neuropathologica (745)

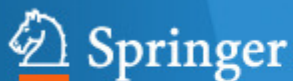*Copyright Transfer*

visit us at [springer.com](http://springer.com)

## Confirmation of your Copyright Transfer

Dear Author,

Please note: This e-mail is a confirmation of your copyright transfer and was sent to you only for your own records.

The copyright to this article is transferred to Springer-Verlag (respective to owner if other than Springer and for U.S. government employees: to the extent transferable) effective if and when the article is accepted for publication. The author warrants that his/her contribution is original and that he/she has full power to make this grant. The author signs for and accepts responsibility for releasing this material on behalf of any and all co-authors. The copyright transfer covers the exclusive right and license to reproduce, publish, distribute and archive the article in all forms and media of expression now known or developed in the future, including reprints, translations, photographic reproductions, microform, electronic form (offline, online) or any other reproductions of similar nature.

An author may self-archive an author-created version of his/her article on his/her own website and or in his/her institutional repository. He/she may also deposit this version on his/her funder's or funder's designated repository at the funder's request or as a result of a legal obligation, provided it is not made publicly available until 12 months after official publication. He/she may not use the publisher's PDF version, which is posted on [www.springerlink.com](http://www.springerlink.com), for the purpose of self-archiving or deposit. Furthermore, the author may only post his/her version provided acknowledgement is given to the original source of publication and a link is inserted to the published article on Springer's website. The link must be accompanied by the following text: "The final publication is available at [www.springerlink.com](http://www.springerlink.com)".

Prior versions of the article published on non-commercial pre-print servers like arXiv.org can remain on these servers and/or can be updated with the author's accepted version. The final published version (in PDF or HTML/XML format) cannot be used for this purpose. Acknowledgement needs to be given to the final publication and a link should be inserted to the published article on Springer's website, accompanied by the text "The final publication is available at [www.springerlink.com](http://www.springerlink.com)".

The author retains the right to use his/her article for his/her further scientific career by including the final published journal article in other publications such as dissertations and postdoctoral qualifications provided acknowledgement is given to the original source of publication.

The author is requested to use the appropriate DOI for the article. Articles disseminated via [www.springerlink.com](http://www.springerlink.com) are indexed, abstracted and referenced by many abstracting and

**Springer: Copyright Transfer**

information services, bibliographic networks, subscription agencies, library networks, and consortia.

After submission of the agreement signed by the corresponding author, changes of authorship or in the order of the authors listed will not be accepted by Springer.

This is an automated e-mail; please do not reply to this account. If you have any questions, please go to our [help pages](#).

Thank you very much.

Kind regards,

Springer Author Services

---

## Article Details

---

### Journal title

Acta Neuropathologica

### Article title

Nodular Bilateral Amygdala Degeneration in Demented Individuals

### DOI

10.1007/s00401-010-0745-3

### Corresponding Author

Tessa Hedley-Whyte

### Copyright transferred to

Springer-Verlag

### Transferred on

Sat Sep 04 16:15:21 CEST 2010

---

## What would you like to do next?

### MyPublication FAQs

Answering your questions to all steps of the MyPublication process.

 [FIND OUT MORE](#)

### [springer.com/authors](http://springer.com/authors)

Your gateway to all author-related information

 [FIND OUT MORE](#)

---

## Visit other Springer Sites

- [SpringerLink](#): Look inside our eJournals and eBooks
- [SpringerImages](#): Find all graphics of our publications
- [SpringerProtocols](#): Database of reproducible protocols in life & biomedical sciences
- [SpringerMaterials](#): Numerical data & functional relationships in science & technology

## Service Contacts

---

### Springer Customer Service Center

Haberstr. 7  
69129 Heidelberg  
Germany  
phone: +49 6221 345 0  
fax: +49 6221 345 4229  
email:  
[orders-HD-individuals@springer.com](mailto:orders-HD-individuals@springer.com)

### Springer New York, LCC

P.O. Box 2485  
Secaucus, NJ 07094-2485  
USA  
phone: +1 201 348 4505  
(Weekdays 8:30am - 5:30pm ET)  
fax: +1 201 348 4505  
email: [service-ny@springer.com](mailto:service-ny@springer.com)
